1 **Does immune suppression during stress occur to promote physical performance?**

2

3 Lynn B. Martin, Amber Brace, Alexandra Urban, Courtney A. C. Coon, and Andrea L. Liebl

4

5 University of South Florida, Department of Integrative Biology, SCA 110, Tampa FL 33620

6

7 **Corresponding author:** Lynn B. Martin, SCA 110, phone: 813-974-0157; fax: 813-974-3263;  
8 email: lbmartin@usf.edu

9

10 **Running head:** Immune and flight in captive sparrows

11

12

13

14

15

16

17

18

19

20

21

22

23

24

25

26

27

28

29

30

31

32

33

34

**Abstract:**

Two adaptationist hypotheses have been proposed to explain why stress, particularly elevation of stress hormones (i.e., glucocorticoids), tends to suppress immune functions. One is that immune suppression represents efforts to minimize autoimmune responses to self-antigens released as organisms cope with stressors (i.e., the autoimmune-avoidance hypothesis). The other is that immune suppression occurs to promote a shunting of resources to life processes more conducive to survival of the stressor (i.e., the re-allocation hypothesis). Here in wild-caught house sparrows (*Passer domesticus*), we tested the second hypothesis, asking whether sustained elevation of baseline glucocorticoids, due to captivity, caused a greater rate of decline in immune functions than flight performance. A greater decline in immune functions than flight performance would support the re-allocation hypothesis. As in previous studies, we found that captivity tended to alter baseline corticosterone, suggesting that house sparrows experience captivity as a stressor. Captivity also affected several constitutive and induced innate immune metrics: bacterial (*Escherichia coli*) killing activity (BKA) of blood and oxidative burst of leukocytes both changed in a manner consistent with immune dysregulation. In contrast, breast muscle size and vertical flight (hovering) duration improved over captivity. Collectively, these changes provide indirect support for the re-allocation hypothesis, although within individuals, changes in immune and physical performance were unrelated.

**Word count: 208**

35  
36  
37  
38  
39  
40  
41  
42  
43  
44  
45  
46  
47  
48  
49  
50  
51  
52  
53  
54  
55  
56  
57  
58  
59  
60  
61  
62  
63  
64  
65  
66  
67  
68

69 **Introduction:**

70 Immune defenses should be beneficial to all organisms at all times, so why are they so  
71 commonly altered in response to stressors? To date, two adaptationist hypotheses have been  
72 proposed. One, the re-allocation hypothesis, invokes physiological trade-offs, specifically that  
73 immune suppression is less detrimental to survival of most stressors than decrements in  
74 physical performance (Sapolsky et al., 2000). According to this hypothesis, during acute stress  
75 responses (e.g., predation events) limited resources (i.e., calories or critical amino acids) should  
76 be shunted to muscles over lymphoid cells and tissues to foster escape from or survival of the  
77 stressor (Sapolsky et al., 2000; Sternberg, 2006). The second (non-exclusive) autoimmune-  
78 avoidance hypothesis recognizes that novel, self-antigens will often be revealed to the immune  
79 system during stress responses (Råberg et al., 1998). Free-radical degradation of self-tissues  
80 in response to stressors could expose antigen presenting and processing leukocytes to peptides  
81 they would otherwise rarely experience. Without attenuation of immune cell activities (via stress  
82 hormones), individuals might be prone to autoimmune damage.

83  
84 Tests of these hypotheses are rare (Bourgeon et al., 2009) with most relevant support coming  
85 from domesticated species. Domesticated species probably experience far fewer and less  
86 intense stressors than wild animals however (Morgan and Tromborg, 2007); indeed, the  
87 domestication process itself profoundly changes the regulation of stress hormones including the  
88 glucocorticoids that have such profound effects on immune functions (Trut et al., 2009). For  
89 instance, domesticated guinea pigs exhibited lower glucocorticoid release in response to a  
90 stressor than wild cavies (*Cavia porcellus*) and even cavies bred for 30 generations in captivity  
91 (Kunzl et al., 2003). These confounds plus the relative paucity of exposure to natural levels of  
92 parasites during the domestication process call into question the eco-evolutionary relevance of  
93 stress-immune studies in domesticated species (Calisi and Bentley, 2009). To understand the  
94 ultimate forces shaping stress-immune interactions, wild organism studies will be more  
95 informative (Calisi and Bentley, 2009).

96  
97 Investigations of stress-immune interactions in non-domesticated species are difficult though.  
98 Most wild species cannot be captured repeatedly, leading many researchers to maintain wild  
99 animals in captivity. Captivity can be problematic too though, as some species might alter  
100 immune activities or stress responses in light of such a comparatively benign environment  
101 whereas others might experience captivity much as imprisonment and undergo physiological  
102 dysregulation (Mason, 2010). We recently found that the immune systems of wild house

103 sparrows (*Passer domesticus*) are disregulated in captivity. Leukocyte infiltration of skin  
104 (Viswanathan and Dhabhar, 2005) became biased towards granulocytes versus lymphocytes  
105 over captivity (Kuhlman and Martin, 2010), perhaps because of elevations in baseline  
106 corticosterone (CORT) in captive compared to free-living individuals. In a more recent study,  
107 inflammatory responses to an immunogenic Gram-negative bacterial component  
108 (lipopolysaccharide, LPS, from *E. coli*) were amplified in captive house sparrows (Martin et al.,  
109 2011): expression of Toll-like receptor 4 and interleukin 1-beta (IL-1 $\beta$ ) by circulating leukocytes  
110 were elevated in month-long captive versus wild birds.

111  
112 In the present study, we took advantage of the effects of captivity on house sparrow CORT to  
113 test the re-allocation hypothesis. Specifically, we asked whether after six weeks in captivity i)  
114 baseline CORT was elevated, and ii) constitutive (*in vitro* bacterial killing ability (Liebl and  
115 Martin, 2009b)) and induced (oxidative burst responses) innate immune responses (Sild and  
116 Horak, 2010) were reduced more so than the size of the major flight muscle and the ability of  
117 birds to perform hovering flight (Veasey et al., 1998). Although the re-allocation hypothesis was  
118 proposed to explain (among other things) the effects of glucocorticoids on immune functions  
119 over very short periods (e.g., minutes to hours), we expected that the apoptotic and anti-  
120 apoptotic effects of GCs on various cells (Amsterdam et al., 2002; Meagher et al., 1996) might  
121 mediate resource re-allocations over longer periods (e.g., days to weeks). We measured  
122 baseline CORT because alterations in this hormone might predict changes in performance  
123 and/or immune functions (Williams, 2008). We chose these induced and constitutive innate  
124 immune functions because they are broadly effective at controlling diverse parasites and they  
125 can be measured repeatedly (weekly) from small blood volumes (Millet et al., 2007). We  
126 measured vertical flight because it is one of the most energy-demanding movements birds use  
127 (Dial et al., 1997). More importantly, it is one of the few performance parameters that can be  
128 accurately and repeatedly scored in songbirds (although for this and other metrics (e.g., CORT),  
129 some habituation might occur).

130

### 131 **Methods:**

#### 132 *Bird capture, care and morphometrics:*

133 Wild adult birds (n = 10; 3 males and 7 females) were captured in mist nets from a single  
134 location in north St. Petersburg, FL, USA in Fall 2011. Fifty  $\mu$ L of blood was collected within 3  
135 minutes of capture from the brachial vein after cleaning the area with 100% alcohol and allowing  
136 the skin to dry. Within 5 minutes of collection, blood samples were processed for bacterial

137 killing activity (see below). Body mass (to 0.1 g), pectoralis width (mm), and furcular fat score  
138 (1-8 ordinal scale, 8 maximum) were then recorded for each individual. After capture, birds  
139 were held singly in cloth bags (2.5 h maximum) until they were transferred to an animal facility  
140 at the University of South Florida. Upon arrival at the facility, birds were housed individually in  
141 conventional songbird cages (35 wide x 27.5 deep x 47.5 cm high) and provided two perches,  
142 *ad libitum* access to mixed seeds (Scarlett Natural Finch, Moyer & Sons, Sauderton, PA) and  
143 water, and isolated from other disturbance except an ~15 minute period daily when their food,  
144 water and cage liners were replaced by caretakers. All birds were allowed to see and hear each  
145 other throughout the study. Photoperiod was maintained at levels comparable to ambient  
146 conditions at the time of capture for the study duration. An additional blood sample (50  $\mu$ L) and  
147 morphometrics were collected weekly for 6 weeks, and on the following day, flight performance  
148 tests were conducted (see below). For all captive birds, blood samples were collected within 5  
149 minutes of entering the housing room. To ensure that all samples were obtained within this  
150 period, 3-4 individuals entered the room simultaneously and bled 1-3 birds each, always  
151 collecting the final sample well within the 5-minute window. At the end of the study, birds were  
152 released at the site of capture. All procedures meet guidelines for the use of animals in  
153 research and were approved by the USF IACUC (#W3202) prior to conducting the work.

154  
155 *Bacterial killing activity (BKA):*

156 *In vitro* bacterial killing activity of blood was assessed following modified lab protocols (Liebl and  
157 Martin, 2009a). From each blood sample, and within 30 seconds of sampling, a 1.5  $\mu$ L aliquot  
158 was added to 34.5  $\mu$ L of CO<sub>2</sub>-independent media in four different microcentrifuge tubes: three to  
159 assess anti-*Escherichia coli* (Gram-negative bacteria) activity and the fourth as a blank in  
160 spectrophotometric measurements. All samples for BKA were held on ice until they were  
161 returned to the lab for processing. In the lab in a BSL-2 laminar flow hood, 12.5  $\mu$ L of a 10<sup>5</sup>  
162 bacteria mL<sup>-1</sup> solution (bacteria from lyophilized pellets (Microbiologics, St. Cloud, MN)  
163 reconstituted in sterile phosphate-buffered saline) was added to each diluted blood sample, and  
164 12.5  $\mu$ L sterile PBS was added to tubes to be used as blanks. Bacteria-blood cocktails were  
165 then vortexed vigorously, incubated at 37°C for 1 h, and vortexed again. Then 250  $\mu$ L of tryptic  
166 soy broth (TSB) was added to all tubes to foster bacterial growth, and incubated for 12 hours at  
167 37°C. Upon completing incubation, sample absorbance was quantified using a Nanodrop 1000  
168 (600nm filter). Each tube was vortexed immediately before absorbance of a 2  $\mu$ L subsample,  
169 from the center of the tube, was measured. Prior to each sample measurement, the Nanodrop  
170 was blanked using the blanks identified above. All samples were referenced against a positive

171 control that was processed and incubated at the same time as blood samples and consisted of  
172 all cocktail components except blood (media was added to adjust final concentrations). Percent  
173 killed was calculated by dividing sample values by the positive control and subtracting this value  
174 from 1. In week 2, blood samples became contaminated prior to assay.

175

176 *Oxidative burst:*

177 For oxidative burst, we followed published protocols (Sild and Horak, 2010) using an ABEL<sup>®</sup>  
178 Cell Activation kit with Pholasin<sup>®</sup> and Adjuvant K<sup>™</sup> (Knight Scientific, Plymouth, UK), measuring  
179 burst 4 times for each individual: once at capture and every two weeks thereafter. Whole blood  
180 samples were held at room temperature until analysis (within 2h of collection). Samples were  
181 assayed individually using a handheld luminometer and total sample volume of 250 $\mu$ l (112.5 $\mu$ l  
182 Reconstitution and Assay Buffer, 25 $\mu$ l 1:100 diluted whole blood, 25 $\mu$ l Adjuvant K, 62.5 $\mu$ l  
183 Pholasin). A 30 second baseline luminescence reading was taken, after which 25 $\mu$ l of  
184 *Escherichia coli* 055.B5 LPS was injected directly into the sample. Luminescence readings  
185 were then recorded every 0.5 sec for 3 min post-injection. For comparisons of burst activity  
186 changes over captivity, we calculated two parameters: baseline burst (mean of RLU  
187 measurements prior to introduction of LPS into samples) and peak burst (maximum RLU value  
188 post-LPS treatment of blood minus baseline burst, calculated as above).

189

190 *Corticosterone (CORT) assay:*

191 A commercially available EIA kit (Assay Designs, Ann Arbor, MI; cat# 900-097) was used to  
192 measure plasma CORT (Breuner et al., 2006). CORT concentrations were measured only four  
193 times during the study, once at capture and every two weeks thereafter. Briefly, 10% steroid  
194 displacement reagent (5  $\mu$ l) was added to 5  $\mu$ l of plasma and 5 min later, assay buffer (240  $\mu$ l)  
195 was added to each sample, vortexed, and aliquoted in duplicate (100  $\mu$ l per well) to assay  
196 plates (Kuhlman and Martin, 2010). In addition, a standard curve (ranging from 200,000 to 32  
197 pg) was measured in duplicate. Samples and standards were then incubated with conjugated  
198 CORT and antibody for 2 h at room temperature while being shaken. Wells were emptied and  
199 washed before substrate was added to all wells; plates were incubated 1 h at room temperature  
200 without shaking. Stop solution was then added, and each plate was read at 405 nm (corrected  
201 at 590 nm to minimize background absorbance).

202 *Vertical flight challenge:*

203 Vertical flight performance was quantified weekly by assessing the height and duration of  
204 hovering flight in a Plexiglass™ vertical flight chamber (115 high x 21.5 wide x 21.5 deep, cm)  
205 housed in a room free of other birds (Blount and Matheson, 2006; Veasey et al., 1998). The  
206 first trial was conducted the morning on the day after capture, as i) birds had just been held in  
207 bags for variable periods before cage housing in the aviary and ii) this approach enabled us to  
208 sample behavior at the same time of day for all individuals. The chamber included a trapdoor  
209 approximately 10 cm above the floor; below the trapdoor was a white-noise emitter. Both were  
210 used to encourage flight once the trial began. To conduct each trial, a video camera was placed  
211 in the room prior to trials, equidistant from the flight chamber for all trials. A single bird was then  
212 captured from its cage in a separate room, placed in the flight box on the trapdoor, and given  
213 ~45 s to accommodate to the conditions, without the experimenter present. To induce vertical  
214 flight, the experimenter simultaneously opened the trapdoor and activated the white noise  
215 emitter (both via remote control). Flights were then recorded for 45 seconds after which the  
216 experimenter turned off the white noise emitter, entered the room and reset the trapdoor. The  
217 experimenter then left the room, waited 45 seconds, and repeated the trial. Video recordings of  
218 flight behavior were then viewed to quantify four parameters: height and duration of the first  
219 vertical flight in response to the dual stimulation of white noise and trapdoor activation. Two  
220 birds (one at the time of capture and one 4-weeks post capture) did not perform during trials, but  
221 zeroes were included in analyses to be conservative.

222

### 223 *Data analysis:*

224 Bacterial killing activity values (% positive control killed) were arcsin square-root transformed.  
225 Thereafter, no variable was significantly non-normal (1-sample Kolmogorov-Smirnov test), so  
226 repeated-measures ANOVA was used for all comparisons. Mauchly's tests were used to test  
227 for sphericity, and when the test was violated ( $P < 0.05$ ), Greenhouse-Geisser corrections were  
228 used to identify significant effects of time on dependent variables. Sex was not evaluated  
229 because of the small sample size within each sex. All analyses were performed with SPSS v18  
230 and  $\alpha \leq 0.05$ .

231

### 232 **Results:**

#### 233 *Captivity impacts on morphometrics and corticosterone:*

234 Body mass declined over time in captivity ( $F_{6, 54} = 15.3$ ,  $P < 0.001$ ; Fig. 1a), decreasing most in  
235 the first week then remaining stable for the remainder of the study. Fat scores declined in the

236 first week, but tended to recover and remain stable for the remainder of the study ( $F_{6,54} = 4.4$ ,  $P$   
 237  $= 0.001$ ; Fig. 1b). Flight muscle, however, increased in size (~9%) over time in captivity ( $F_{6,54} =$   
 238  $11.0$ ,  $P < 0.001$ ; Fig. 1c). Baseline CORT also increased over captivity ( $F_{3,24} = 3.4$ ,  $P = 0.03$ ;  
 239 Fig. 1d) after one outlier was dropped (BL CORT at time of capture was  $>2SD$  of mean for other  
 240 individuals).

241

242 *Captivity impacts on immune functions:*

243 Bacterial killing ability (BKA) did not change in a simple fashion over captivity ( $F_{2.8, 25.5} = 2.3$ ,  $P =$   
 244  $0.10$ ). BKA tended to decrease in the first weeks of captivity, but recovered by week 5 (Fig. 2a).  
 245 Baseline (pre-LPS) oxidative burst changed dramatically over time in captivity ( $F_{1.5, 27} = 35.9$ ,  $P$   
 246  $< 0.001$ ), increasing rapidly until week 4 and declining thereafter but not nearly to levels  
 247 measured at capture (Fig. 2b). Peak burst activity also changed over captivity ( $F_{1.7, 15.9} = 9.9$ ,  $P$   
 248  $= 0.002$ ), increasing by 2 weeks of captivity, then returning to near-capture levels by 6 weeks  
 249 (Fig. 2c).

250

251 *Captivity effects on flight performance:*

252 Hovering duration changed over captivity ( $F_{5, 45} = 7.3$ ,  $P < 0.001$ ), increasing rapidly in the week  
 253 post capture and remaining high but decreasing slowly over the remainder of the study (Fig. 3a).  
 254 Flight height did not change significantly with captivity duration ( $F_{2.0, 18.4} = 2.3$ ,  $P = 0.12$ ),  
 255 although it too tended to increase the longer birds remained captive (Fig. 3b).

256

257 *Relationships among traits within-individuals:*

258 Spearman rank correlation analysis indicated only two significant relationships between a)  
 259 means of trait values across all time intervals and/or b) % change in trait values. Mean baseline  
 260 oxidative burst was inversely related to peak oxidative burst ( $r = -0.87$ ,  $P = 0.001$ ), and change  
 261 in fat score was inversely related to change in body mass ( $r = -0.65$ ,  $P = 0.04$ ). Thus, at the  
 262 individual level, there was little evidence that changes in immune traits were directly related to  
 263 changes in morphological or performance-related traits.

264

265 **Discussion:**

266 Body mass declined, fat scores decreased then recovered, and baseline CORT increased with  
 267 captivity duration for house sparrows. Immune functions became disregulated (oxidative burst,  
 268 see below) or declined modestly then recovered (BKA) over captivity. However, flight muscles  
 269 grew and this growth co-occurred with improvements in hovering flight performance. Overall,



270 these effects are consistent with the re-allocation hypothesis: in the presence of elevated  
271 glucocorticoids, physical performance (hovering) improved whereas immune function declined.  
272 As yet though, these data provide only indirect, weak support for the re-allocation hypothesis,  
273 especially as correlation analyses indicated that changes in endocrine, immune and  
274 performance variables were unrelated within individuals. Moreover, our results examine a  
275 different time frame than was addressed by the original re-allocation hypothesis, so it would be  
276 intriguing to conduct a similar study over even shorter time periods post-stressor. Below, we  
277 interpret our results and propose additional, more direct ways to test the re-allocation  
278 hypothesis.

279

### 280 *Can captivity cause stress to house sparrows?*

281 Captivity effects on baseline CORT vary in house sparrows, sometimes leading to elevations  
282 (Kuhlman and Martin, 2010) and other times not (Martin et al., 2011). In the present study,  
283 baseline CORT tended to increase with captivity duration. Similar results of captivity have been  
284 observed in other wild animals (Romero and Wingfield, 1999), especially soon after capture  
285 (Mason, 2010). Basal glucocorticoids are highest in the first few days post-capture in wild  
286 kawahai (*Arrapis trutta*) (Davidson et al., 1997), and in chukars (*Alectornis chukar*), individuals  
287 lost mass, the ability to release CORT to a restraint stressor, and corticosterone negative  
288 feedback capacity soon after capture but regained all three abilities within 10 days (Dickens et  
289 al., 2009c). Similar patterns have been seen in sympathetic nervous system coordination of  
290 heart rate; in captive European starlings (*Sturnus vulgaris*), a series of stressors induced an  
291 elevation of baseline heart rate (HR). However further elevation in HR due to an additional  
292 stressor was weak for the first several days of captivity (Dickens and Romero, 2009). In light of  
293 these effects, across various taxa, it seems reasonable to interpret captivity as at least a mild,  
294 psychological stressor for many species including house sparrows (Dickens et al., 2009a).

295

### 296 *Captivity effects on immune functions:*

297 Many species experience immune decrements in captivity (Berzins et al., 2008; Davis and  
298 Maerz, 2008; Ewenson et al., 2003; Ewenson et al., 2001), and such results are consistent with  
299 the effects of stress hormones on many immune functions (Sorrells and Sapolsky, 2007).  
300 Inflammatory cells and processes seem particularly prone to perturbation in captivity (Buehler et  
301 al., 2008), although this observation has exceptions (Sepp et al., 2010). House sparrows  
302 appear prone to hyper-inflammation over long periods in captivity (Kuhlman and Martin, 2010;  
303 Martin et al., 2011). Whereas such enhancements might be interpreted as protective, these

304 elevations are more likely indicative of immune dysregulation with subsequent, strong negative  
305 impacts (i.e., immunopathology) on hosts (Graham et al., 2011). In the present study, we  
306 examined captivity effects on two innate immune measures: BKA (Millet et al., 2007) and  
307 oxidative burst (Sepp et al., 2010; Sild and Horak, 2010). Functionally, the former index is  
308 simple to interpret: more killed bacteria is likely protective. Over captivity, BKA tended to  
309 decrease then recover to wild-caught values; if captivity is representative of stressors persisting  
310 over similar time periods, house sparrows would likely be vulnerable to Gram-negative bacterial  
311 infections in the bloodstream for short periods then recover. The latter index, oxidative burst, is  
312 more difficult to interpret functionally, especially given the distinct effects of captivity on baseline  
313 and induced (peak) burst responses. Both values represent the activity of heterophils and other  
314 granulocytes to release reactive oxygen species (predominantly superoxide). For baseline burst  
315 though, levels represent the activity of cells in the absence of microbial stimuli whereas for peak  
316 burst, levels represent inducibility in response to an immunogenic substance (LPS). We  
317 interpret the captivity effects seen here as dysregulation because baseline values were several  
318 orders of magnitude higher than ever observed in greenfinches (*Carduelis chloris*), the species  
319 in which this assay was first validated (lower dashed line in Fig. 2b; Sild and Horak 2010) and  
320 the only other songbird species yet studied. Maintaining large numbers of cells expressing high  
321 levels of reactive oxygen species probably causes some oxidative damage to captive birds.  
322 Further indicative of dysregulation, in greenfinches, LPS treatment of blood greatly elevated  
323 burst activity (upper dashed line in Fig. 2b); in house sparrows however, especially after a few  
324 weeks of captivity, LPS treatment could not further elevate burst responses.

325  
326 *Captivity effects on flight muscle and performance:*

327 Perhaps the most surprising result of the study was the strong positive effects of captivity  
328 duration on hovering ability and pectoralis muscle width. Captivity was expected to have weak  
329 but negative effects on these traits because i) birds would be able to exercise little in cages (and  
330 thus experience atrophy due to disuse (Portugal et al., 2009; Price et al., 2011)), and ii) because  
331 chronically elevated corticosterone tends to degrade muscle in domesticated game birds (Dong  
332 et al., 2007; Hull et al., 2007) and wild songbirds (Awerman and Romero, 2010; Busch et al.,  
333 2008; Gray et al., 1990). As our study was not designed to determine how captivity altered  
334 muscle growth and viability in sparrows on the molecular level, we can only speculate as to why  
335 house sparrow physical performance *improved* with captivity duration. One possibility is the re-  
336 allocation hypothesis: although captivity altered stress hormone regulation, this dysregulation  
337 was sufficient to alter only immune functions; muscle size increased and function seemingly

338 improved over the experiment. Indeed, different duration stressors may have distinct effects on  
339 different physiological systems in many species. For instance, it is reasonable that wild birds  
340 would be under some nutritional stress and that captivity would provide more and more  
341 predictable food resources than natural conditions. An abundance of food may promote some  
342 systems, but the psychological distress of being held in a cage or handled repeatedly may incite  
343 degradation of other cells and tissues. Perhaps in house sparrows (or wild birds generally),  
344 lymphoid tissues and cells are more susceptible to CORT or other stress hormones than  
345 myocytes. Even though elevated CORT can increase feeding behavior (Kitaysky et al., 2001),  
346 some physiological systems may be less able than others to balance the enhance and  
347 degrading effects of stressors (Diamond, 1993; Martin et al., 2007).

348  
349 A second possibility is that house sparrows are physiologically unique, not representative of  
350 response to captivity as other wild animals. They are a close commensal of humans (Anderson,  
351 2006) and one of the world's most broadly distributed species (Schrey et al., 2011). They also  
352 exhibit some immune and endocrine novelties seen in few other songbirds (Lee et al., 2005;  
353 Martin et al., 2010; Martin et al., 2005). Although unsatisfying at the mechanistic level, these  
354 traits, together with the niche that house sparrows occupy, may enable them to grow flight  
355 muscles and perform well physically under conditions that would be stressful to other species.

356  
357 A third possibility is that changes in immune and flight parameters represent distinct circannual  
358 rhythms for different tissues, not effects of captivity and/or stress. It was impossible to include a  
359 group in our study that did not experience captivity but still served as a reference for trait  
360 comparisons. Perhaps the observed changes in flight musculature and hovering ability, as well  
361 as oxidative burst, are typical changes that occur at these times of year in this population.  
362 Seasonal changes in avian immune functions are well known (Martin et al., 2008). Moreover, in  
363 many avian species, muscles can change size on short time scales (Lindstrom et al., 2000), and  
364 size changes can occur without changes in environmental stimuli such as photoperiod (Dietz et  
365 al., 1999). Muscle size changes likewise can occur regardless of use/disuse in birds: one group  
366 of barnacle geese (*Branta leucopsis*), captive and flightless all their lives, grew and shrank  
367 pectoralis muscles as much as 35% contingent on molt stage (Portugal et al., 2009).  
368 Collectively, the effects of stress hormones on the musculature of wild animals warrant greater  
369 study, as effects appear contingent on both species and timing (Chin et al., 2009; John-Alder et  
370 al., 2009).

371

372 A fourth possibility involves the constraints of the different study methods. Some, such as the  
373 flight box, may entail habituation such that low values in week 0 followed by an increase and  
374 decline thereafter, comprise both physical and mental changes. On the other hand, changes in  
375 immune functions too have inferential limitations. Others and we assume that quantitative  
376 immune variation has functional relevance, but without direct testing, we cannot be sure that  
377 these magnitude changes would make individuals more vulnerable to infection or other  
378 diseases. In the present study, assays were chosen based on their modest requirements (i.e.,  
379 blood volume) and lack of the need of training for birds (i.e., flight in a wind tunnel). Whereas  
380 other metrics, such as wind tunnel performance, might be less apt to suffer from confounds, the  
381 training it would require could impose more stress and jeopardize our ability to conduct the  
382 study over the necessary time scale (i.e., immediately after capture from the wild).

383

#### 384 *Correlations among traits:*

385 If immune dysregulation occurred to free resources for performance and if such effects were  
386 mediated by CORT, we might have observed correlations among traits within individuals  
387 (Williams, 2008). Although two significant correlations were detected (both i) peak and baseline  
388 oxidative burst and ii) body mass loss and fat mass score were inversely related), neither  
389 supported direct effects of changes in one suite of traits with changes in others. Lack of  
390 correlations may be due to the time scales over which re-allocations occur, happening faster or  
391 slower than our sampling paradigm could detect. Alternatively or additionally, compensation  
392 may have occurred in other systems (e.g., neurogenesis, alimention, etc.). Going forward, it  
393 would be rewarding to test the re-allocation hypothesis directly by using stable (McCue et al.,  
394 2011) or radioisotopes (Zera and Zhao, 2006) of critical amino acids.

395

#### 396 *Conclusions:*

397 We found indirect support of the re-allocation hypothesis for stress-immune interactions: house  
398 sparrow immune functions were dysregulated but flight performance and flight muscle size  
399 increased in response to captivity. We advocate future research on stress-immune interactions  
400 in wild animals, including tests of basic hypotheses as well as practical work to improve animal  
401 husbandry and conservation efforts. Such work might elucidate how to help animals cope with  
402 translocation (Dickens et al., 2009b), and why captive Pallas' cats (*Otocolobus manul*) are  
403 particularly prone to dying from toxoplasmosis (Brown et al., 2005) whereas captive, but not  
404 wild, cheetahs (*Acionyx jubatus*) are prone to gastritis from opportunistic *Helicobacter* infections  
405 (Terio et al., 1999).

406 **Acknowledgements:**

407 We thank Laura Kidd and Chloe Josefson for help with lab work. Funding was from USF  
 408 Undergraduate Research (to AU) as well as funding from USF College of Arts and Sciences to  
 409 LBM.

410

411 **Figure legends:**

412 **Fig.1** – Captivity duration effects on a) body mass, b) fat score, c) pectoral muscle width, and d)  
 413 baseline corticosterone in house sparrows. Bars are means +/- 1SE. P values depict effects of  
 414 time in captivity.

415

416 **Fig. 2** – Captivity duration effects on a) bacterial killing ability (*E. coli* bacteria) of whole blood,  
 417 b) baseline oxidative burst, and c) lipopolysaccharide-induced oxidative burst in house  
 418 sparrows. Bars are means +/- 1SE. P values depict effects of time in captivity.

419

420 **Fig. 3** – Captivity duration effects on physical performance in house sparrows: a) duration of a  
 421 hovering flight, and b) maximum height of a hovering flight. Bars are means +/- 1SE; P values  
 422 depict effects of time in captivity.

423

424 **References:**

425 **Amsterdam, A., Tajima, K. and Sasson, R.** (2002). Cell-specific regulation of apoptosis by  
 426 glucocorticoids: implication to their anti-inflammatory action. *Biochemical Pharmacology* **64**, 843-  
 427 850.

428 **Anderson, T. R.** (2006). *Biology of the Ubiquitous House Sparrow*: Oxford University Press.

429 **Awerman, J. L. and Romero, L. M.** (2010). Chronic psychological stress alters body weight  
 430 and blood chemistry in European starlings (*Sturnus vulgaris*). *Comparative Biochemistry and*  
 431 *Physiology a-Molecular & Integrative Physiology* **156**, 136-142.

432 **Berzins, L. L., Tilman-Schindel, E. and Burness, G.** (2008). Sex-specific effects of handling  
 433 time on an index of immune activity in zebra finches. *Physiological and Biochemical Zoology* **81**,  
 434 383-387.

435 **Blount, J. D. and Matheson, S. M.** (2006). Effects of carotenoid supply on escape flight  
 436 responses in zebra finches, *Taeniopygia guttata*. *Animal Behaviour* **72**, 595-601.

437 **Bourgeon, S., Maho, Y. L. and Raclot, T.** (2009). Proximate and ultimate mechanisms  
 438 underlying immunosuppression during the incubation fast in female eiders: Roles of  
 439 triiodothyronine and corticosterone. *General and Comparative Endocrinology* **163**, 77-82.

440 **Breuner, C. W., Lynn, S. E., Julian, G. E., Cornelius, J. M., Heidinger, B. J., Love, O. P.,**  
 441 **Sprague, R. S., Wada, H. and Whitman, B. A.** (2006). Plasma-binding globulins and acute stress  
 442 response. *Hormone and Metabolic Research* **38**, 260-268.

443 **Brown, M., Lappin, M. R., Brown, J. L., Munkhtsog, B. and Swanson, W. F.** (2005).  
 444 Exploring the ecologic basis for extreme susceptibility of Pallas' cats (*Otocolobus manul*) to fatal  
 445 toxoplasmosis. *Journal of Wildlife Diseases* **41**, 691-700.

- 446 **Buehler, D. M., Bhola, N., Barjaktarov, D., Goymann, W., Schwabl, I., Tieleman, B. I. and**  
 447 **Piersma, T.** (2008). Constitutive immune function responds more slowly to handling stress than  
 448 corticosterone in a shorebird. *Physiological and Biochemical Zoology* **81**, 673-681.
- 449 **Busch, D. S., Sperry, T. S., Peterson, E., Do, C.-T., Wingfield, J. C. and Boyd, E. H.** (2008).  
 450 Impacts of frequent, acute pulses of corticosterone on condition and behavior of Gambel's white-  
 451 crowned sparrow (*Zonotrichia leucophrys gambelii*). *General and Comparative Endocrinology* **158**,  
 452 224-233.
- 453 **Calisi, R. M. and Bentley, G. E.** (2009). Lab and field experiments: Are they the same  
 454 animal? *Hormones and Behavior* **56**, 1-10.
- 455 **Chin, E. H., Love, O. P., Verspoor, J. J., Williams, T. D., Rowley, K. and Burness, G.** (2009).  
 456 Juveniles exposed to embryonic corticosterone have enhanced flight performance. *Proceedings of*  
 457 *the Royal Society B-Biological Sciences* **276**, 499-505.
- 458 **Davidson, G. W., Thorarensen, H. T., Lokman, M. and Davie, P. S.** (1997). Stress of  
 459 capture and captivity in kahawai *Arripis trutta* (Bloch and Schneider) (Perciformes : Arripidae).  
 460 *Comparative Biochemistry and Physiology a-Molecular and Integrative Physiology* **118**, 1405-1410.
- 461 **Davis, A. K. and Maerz, J. C.** (2008). Comparison of hematological stress indicators in  
 462 recently captured and captive paedomorphic Mole Salamanders, *Ambystoma talpoideum*. *Copeia*,  
 463 613-617.
- 464 **Dial, K. P., Biewener, A. A., Tobalske, B. W. and Warrick, D. R.** (1997). Mechanical power  
 465 output of bird flight. *Nature* **390**, 67-70.
- 466 **Diamond, J. M.** (1993). EVOLUTIONARY PHYSIOLOGY - QUANTITATIVE DESIGN OF LIFE.  
 467 *Nature* **366**, 405-406.
- 468 **Dickens, M., Romero, L. M., Cyr, N. E., Dunn, I. C. and Meddle, S. L.** (2009a). Chronic  
 469 Stress Alters Glucocorticoid Receptor and Mineralocorticoid Receptor mRNA Expression in the  
 470 European Starling (*Sturnus vulgaris*) Brain. *Journal of Neuroendocrinology* **21**, 832-840.
- 471 **Dickens, M. J., Delehanty, D. J. and Romero, L. M.** (2009b). Stress and translocation:  
 472 alterations in the stress physiology of translocated birds. *Proceedings of the Royal Society B-*  
 473 *Biological Sciences* **276**, 2051-2056.
- 474 **Dickens, M. J., Earle, K. A. and Romero, L. M.** (2009c). Initial transference of wild birds to  
 475 captivity alters stress physiology. *General and Comparative Endocrinology* **160**, 76-83.
- 476 **Dickens, M. J. and Romero, L. M.** (2009). Wild European Starlings (*Sturnus vulgaris*)  
 477 Adjust to Captivity with Sustained Sympathetic Nervous System Drive and a Reduced Fight-or-  
 478 Flight Response. *Physiological and Biochemical Zoology* **82**, 603-610.
- 479 **Dietz, M. W., Piersma, T. and Dekinga, A.** (1999). Body-building without power training:  
 480 Endogenously regulated pectoral muscle hypertrophy in confined shorebirds. *Journal of*  
 481 *Experimental Biology* **202**, 2831-2837.
- 482 **Dong, H., Lin, H., Jiao, H. C., Song, Z. G., Zhao, J. P. and Jiang, K. J.** (2007). Altered  
 483 development and protein metabolism in skeletal muscles of broiler chickens (*Gallus gallus*  
 484 *domesticus*) by corticosterone. *Comparative Biochemistry and Physiology a-Molecular & Integrative*  
 485 *Physiology* **147**, 189-195.
- 486 **Ewenson, E., Zann, R. and Flannery, G.** (2003). PHA immune response assay in captive  
 487 zebra finches is modulated by activity prior to testing. *Animal Behaviour* **66**, 797-800.
- 488 **Ewenson, E. L., Zann, R. A. and Flannery, G. R.** (2001). Body condition and immune  
 489 response in wild zebra finches: effects of capture, confinement and captive-rearing.  
 490 *Naturwissenschaften* **88**, 391-394.
- 491 **Graham, A. L., Shuker, D. M., Pollitt, L. C., Auld, S. K. J. R., Wilson, A. J. and Little, T. J.**  
 492 (2011). Fitness consequences of immune responses: strengthening the empirical framework for  
 493 ecoimmunology. *Functional Ecology* **25**, 5-17.

- 494 **Gray, J. M., Yarian, D. and Ramenofsky, M.** (1990). CORTICOSTERONE, FORAGING  
 495 BEHAVIOR, AND METABOLISM IN DARK-EYED JUNCOS, JUNCO-HYEMALIS. *General and*  
 496 *Comparative Endocrinology* **79**, 375-384.
- 497 **Hull, K. L., Cockrem, J. F., Bridges, J. P., Candy, E. J. and Davidson, C. M.** (2007). Effects of  
 498 corticosterone treatment on growth, development, and the corticosterone response to handling in  
 499 young Japanese quail. *Comparative Biochemistry and Physiology a-Molecular & Integrative*  
 500 *Physiology* **148**, 531-543.
- 501 **John-Alder, H. B., Cox, R. M., Haenel, G. J. and Smith, L. C.** (2009). Hormones, performance  
 502 and fitness: Natural history and endocrine experiments on a lizard (*Sceloporus undulatus*).  
 503 *Integrative and Comparative Biology* **49**, 393-407.
- 504 **Kitaysky, A. S., Wingfield, J. C. and Piatt, J. F.** (2001). Corticosterone facilitates begging  
 505 and affects resource allocation in the black-legged kittiwake. *Behavioral Ecology* **12**, 619-625.
- 506 **Kuhlman, J. R. and Martin, L. B.** (2010). Captivity affects immune redistribution to skin in  
 507 a wild bird. *Functional Ecology* **24**, 830-837.
- 508 **Kunzl, C., Kaiser, S., Meier, E. and Sachser, N.** (2003). Is a wild mammal kept and reared  
 509 in captivity still a wild animal? *Hormones and Behavior* **43**, 187-196.
- 510 **Lee, K. A., Martin, L. B. and Wikelski, M. C.** (2005). Responding to inflammatory  
 511 challenges is less costly for a successful avian invader, the house sparrow (*Passer domesticus*), than  
 512 its less-invasive congener. *Oecologia* **145**, 244-251.
- 513 **Liebl, A. L. and Martin, L. B.** (2009a). Simple quantification of antimicrobial capacity of  
 514 blood using spectrophotometry. *Functional Ecology* **23**, 1091-1096.
- 515 **Liebl, A. L. and Martin, L. B.** (2009b). Simple quantification of blood and plasma  
 516 antimicrobial capacity using spectrophotometry. *Functional Ecology* **23**, 1091-1096.
- 517 **Lindstrom, A., Kvist, A., Piersma, T., Dekinga, A. and Dietz, M. W.** (2000). Avian pectoral  
 518 muscle size rapidly tracks body mass changes during flight, fasting and fuelling. *Journal of*  
 519 *Experimental Biology* **203**, 913-919.
- 520 **Martin, L. B., Alam, J. L., Imboma, T. and Liebl, A. L.** (2010). Variation in inflammation as a  
 521 correlate of range expansion in Kenyan house sparrows. *Oecologia* **164**, 339-347.
- 522 **Martin, L. B., Gilliam, J., Han, P., Lee, K. and Wikelski, M.** (2005). Corticosterone  
 523 suppresses cutaneous immune function in temperate but not tropical house sparrows, *Passer*  
 524 *domesticus*. *General and Comparative Endocrinology* **140**, 126-135.
- 525 **Martin, L. B., Kidd, L., Liebl, A. L. and Coon, C. A.** (2011). Captivity induced  
 526 hyperinflammation in house sparrows. *Journal of Experimental Biology* **214**, 2579-2585.
- 527 **Martin, L. B., Navara, K. J., Weil, Z. M. and Nelson, R. J.** (2007). Immunological memory is  
 528 compromised by food restriction in deer mice, *Peromyscus maniculatus*. *American Journal of*  
 529 *Physiology-Regulatory Integrative and Comparative Physiology* **292**, R316-R320.
- 530 **Martin, L. B., Weil, Z. M. and Nelson, R. J.** (2008). Seasonal changes in vertebrate immune  
 531 activity: mediation by physiological trade-offs. *Philosophical Transactions of the Royal Society of*  
 532 *London B Biological Sciences* **363**, 321-339.
- 533 **Mason, G. J.** (2010). Species differences in responses to captivity: stress, welfare and the  
 534 comparative method. *Trends in Ecology & Evolution* **25**, 713-721.
- 535 **McCue, M. D., Smith, A., McKinney, R., Rewald, B., Pinshow, B. and McWilliams, S. R.**  
 536 (2011). A Mass Balance Approach to Identify and Compare Differential Routing of (13)C-Labeled  
 537 Carbohydrates, Lipids, and Proteins In Vivo. *Physiological and Biochemical Zoology* **84**, 506-513.
- 538 **Meagher, L. C., Cousin, J. M., Seckl, J. R. and Haslett, C.** (1996). Opposing effects of  
 539 glucocorticoids on the rate of apoptosis in neutrophilic and eosinophilic granulocytes. *The Journal*  
 540 *of Immunology* **156**, 4422-8.
- 541 **Millet, S., Bennett, J., Lee, K. A., Hau, M. and Klasing, K. C.** (2007). Quantifying and  
 542 comparing constitutive immunity across avian species. *Developmental and Comparative*  
 543 *Immunology* **31**, 188-201.

- 544 **Morgan, K. N. and Tromborg, C. T.** (2007). Sources of stress in captivity. *Applied Animal*  
 545 *Behaviour Science* **102**, 262-302.
- 546 **Portugal, S. J., Thorpe, S. K. S., Green, J. A., Myatt, J. P. and Butler, P. J.** (2009). Testing the  
 547 use/disuse hypothesis: pectoral and leg muscle changes in captive barnacle geese *Branta leucopsis*  
 548 during wing moult. *Journal of Experimental Biology* **212**, 2403-2410.
- 549 **Price, E. R., Bauchinger, U., Zajac, D. M., Cerasale, D. J., McFarlan, J. T., Gerson, A. R.,**  
 550 **McWilliams, S. R. and Guglielmo, C. G.** (2011). Migration- and exercise-induced changes to flight  
 551 muscle size in migratory birds and association with IGF1 and myostatin mRNA expression. *Journal*  
 552 *of Experimental Biology* **214**, 2823-2831.
- 553 **Råberg, L., Grahn, M., Hasselquist, D. and Svensson, E.** (1998). On the adaptive  
 554 significance of stress-induced immunosuppression. *Proceedings of the Royal Society of London Series*  
 555 *B-Biological Sciences* **265**, 1637-1641.
- 556 **Romero, L. M. and Wingfield, J. C.** (1999). Alterations in hypothalamic-pituitary-adrenal  
 557 function associated with captivity in Gambel's white-crowned sparrows (*Zonotrichia leucophrys*  
 558 *gambelii*). *Comparative Biochemistry and Physiology B-Biochemistry & Molecular Biology* **122**, 13-20.
- 559 **Sapolsky, R. M., Romero, L. M. and Munck, A. U.** (2000). How do glucocorticoids influence  
 560 stress responses? Integrating permissive, suppressive, stimulatory, and preparative actions.  
 561 *Endocrine Reviews* **21**, 55-89.
- 562 **Schrey, A. W., Grispo, M., Awad, M., Cook, M. B., McCoy, E. D., Mushinsky, H. R.,**  
 563 **Albayrak, T., Bensch, S., Burke, T., Butler, L. K. et al.** (2011). Broad-scale latitudinal patterns of  
 564 genetic diversity among native European and introduced house sparrow (*Passer domesticus*)  
 565 populations. *Molecular Ecology* **20**, 1133-1143.
- 566 **Sepp, T., Sild, E. and Horak, P.** (2010). Hematological Condition Indexes in Greenfinches:  
 567 Effects of Captivity and Diurnal Variation. *Physiological and Biochemical Zoology* **83**, 276-282.
- 568 **Sild, E. and Horak, P.** (2010). Assessment of oxidative burst in avian whole blood samples:  
 569 validation and application of a chemiluminescence method based on Pholasin. *Behavioral Ecology*  
 570 *and Sociobiology* **64**, 2065-2076.
- 571 **Sorrells, S. F. and Sapolsky, R. M.** (2007). An inflammatory review of glucocorticoid  
 572 actions in the CNS. *Brain Behav Immun* **21**, 259-272.
- 573 **Sternberg, E. M.** (2006). Neural regulation of innate immunity: a coordinated nonspecific  
 574 host response to pathogens. *Nature Reviews Immunology* **6**, 318-328.
- 575 **Terio, K. A., Citino, S. B. and Brown, J. L.** (1999). Fecal cortisol metabolite analysis for  
 576 noninvasive monitoring of adrenocortical function in the cheetah (*Acinonyx jubatus*). *Journal of Zoo*  
 577 *and Wildlife Medicine* **30**, 484-491.
- 578 **Trut, L., Oskina, I. and Kharlamova, A.** (2009). Animal evolution during domestication:  
 579 the domesticated fox as a model. *Bioessays* **31**, 349-360.
- 580 **Veasey, J. S., Metcalfe, N. B. and Houston, D. C.** (1998). A reassessment of the effect of  
 581 body mass upon flight speed and predation risk in birds. *Animal Behaviour* **56**, 883-889.
- 582 **Viswanathan, K. and Dhabhar, F. S.** (2005). Stress-induced enhancement of leukocyte  
 583 trafficking into sites of surgery or immune activation. *Proceedings of the National Academy of*  
 584 *Sciences of the United States of America* **102**, 5808-5813.
- 585 **Williams, T. D.** (2008). Individual variation in endocrine systems: moving beyond the  
 586 'tyranny of the Golden Mean'. *Philosophical Transactions of the Royal Society B-Biological Sciences*  
 587 **363**, 1687-1698.
- 588 **Zera, A. J. and Zhao, Z. W.** (2006). Intermediary metabolism and life-history trade-offs:  
 589 Differential metabolism of amino acids underlies the dispersal-reproduction trade-off in a wing-  
 590 polymorphic cricket. *American Naturalist* **167**, 889-900.



**Fig. 1. Captivity duration effects on a) body mass, b) fat score, c) pectoral muscle width, and d) baseline corticosterone in house sparrows. P values depict effect of time on each parameter.**

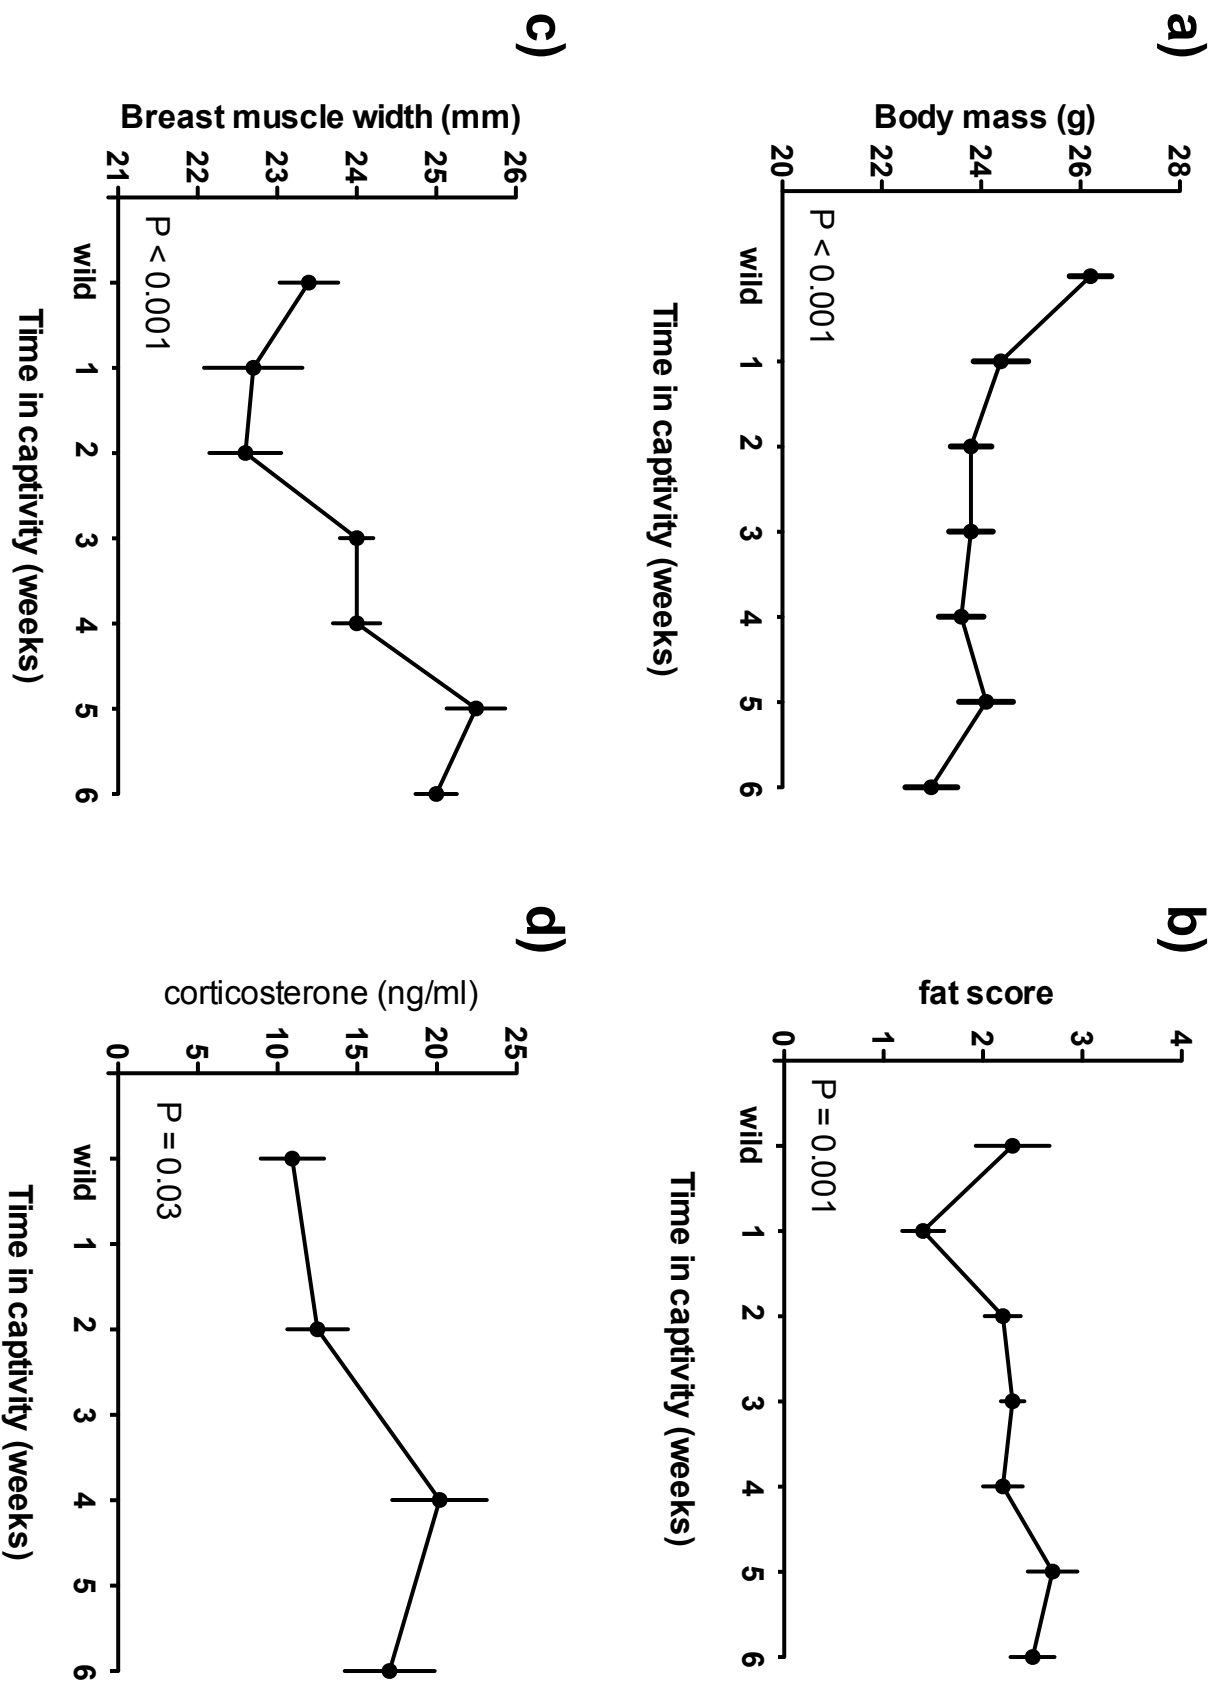

**Fig. 2. Captivity duration effects on a) anti-*E. coli* bacteria capacity of whole blood, b) baseline oxidative burst, and c) lipopolysaccharide-induced oxidative burst in house sparrows. Bars are means  $\pm$  1SE; P values depict effect of time in captivity.**

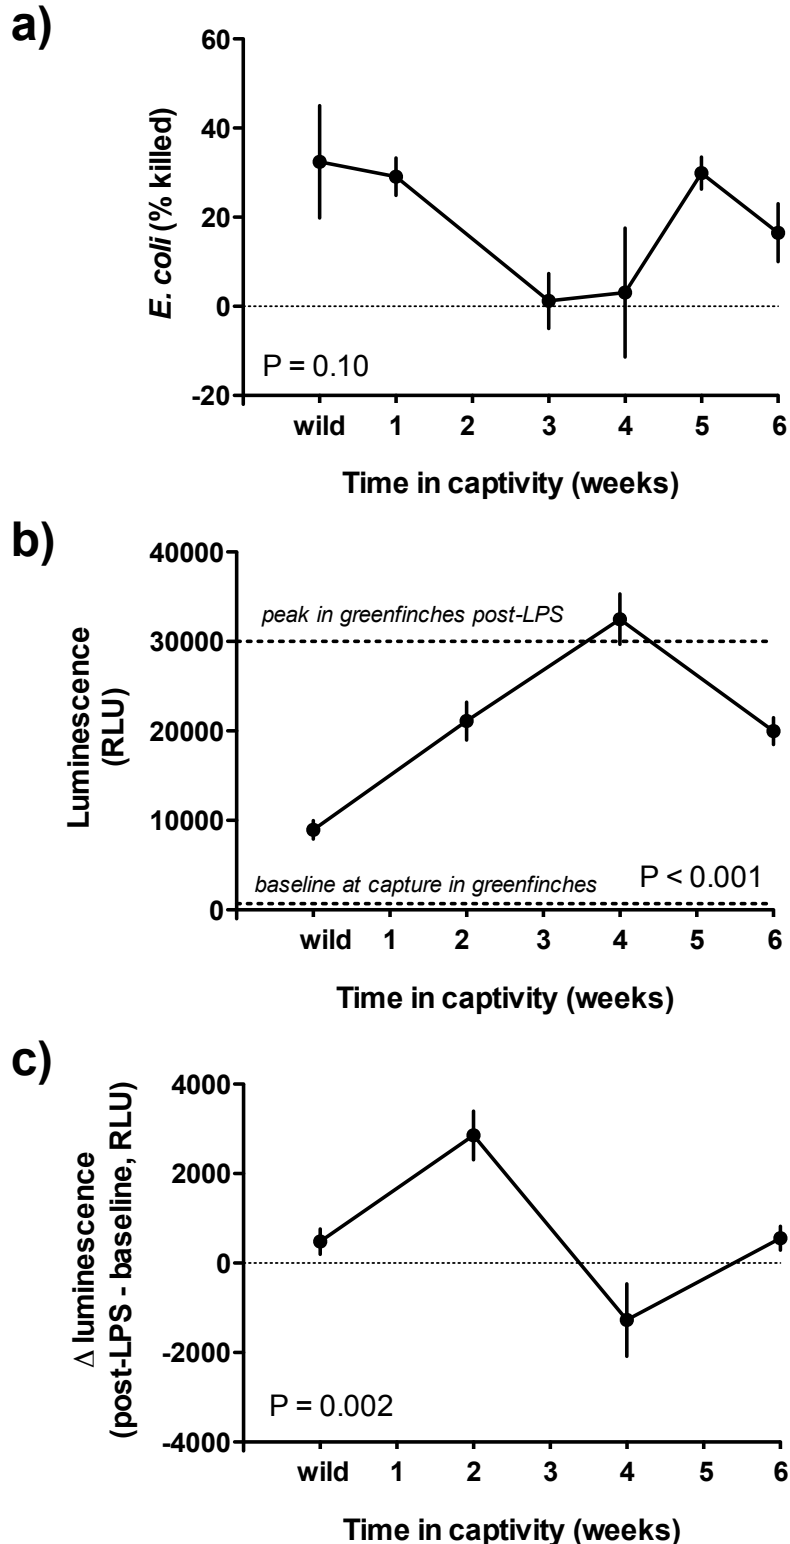

Fig. 3. Captivity duration effects on physical performance in house sparrows: a) duration of a hovering flight, and b) maximum height of hovering flight. Bars are means  $\pm$  1SE; P values depict effect of time on each parameter.

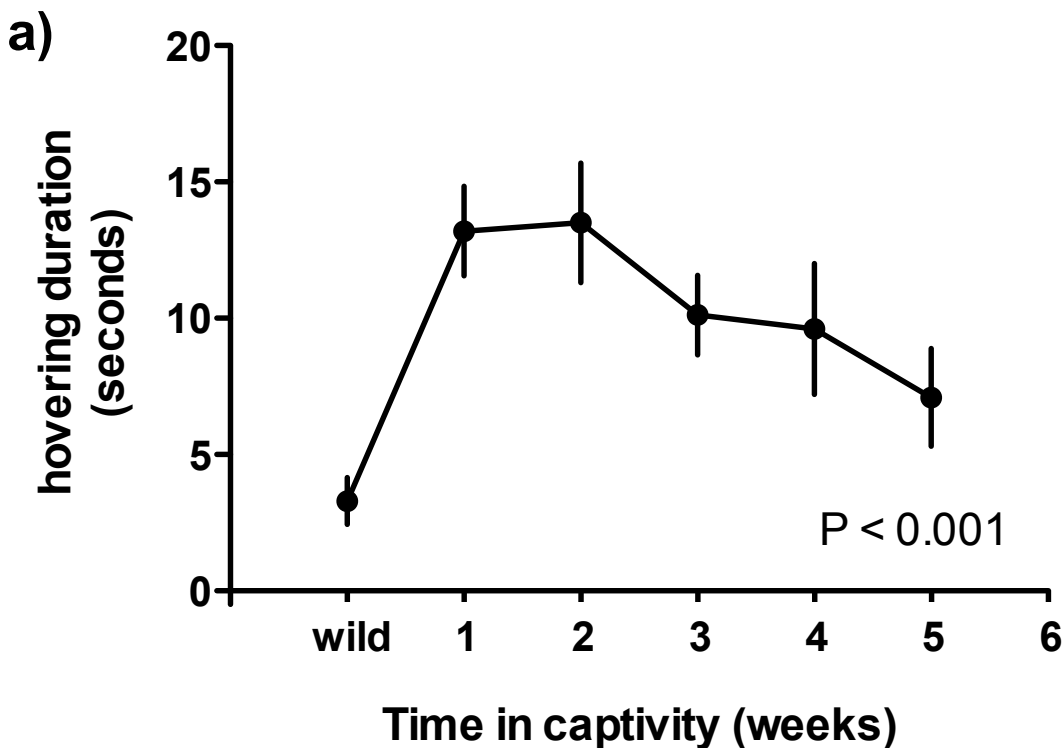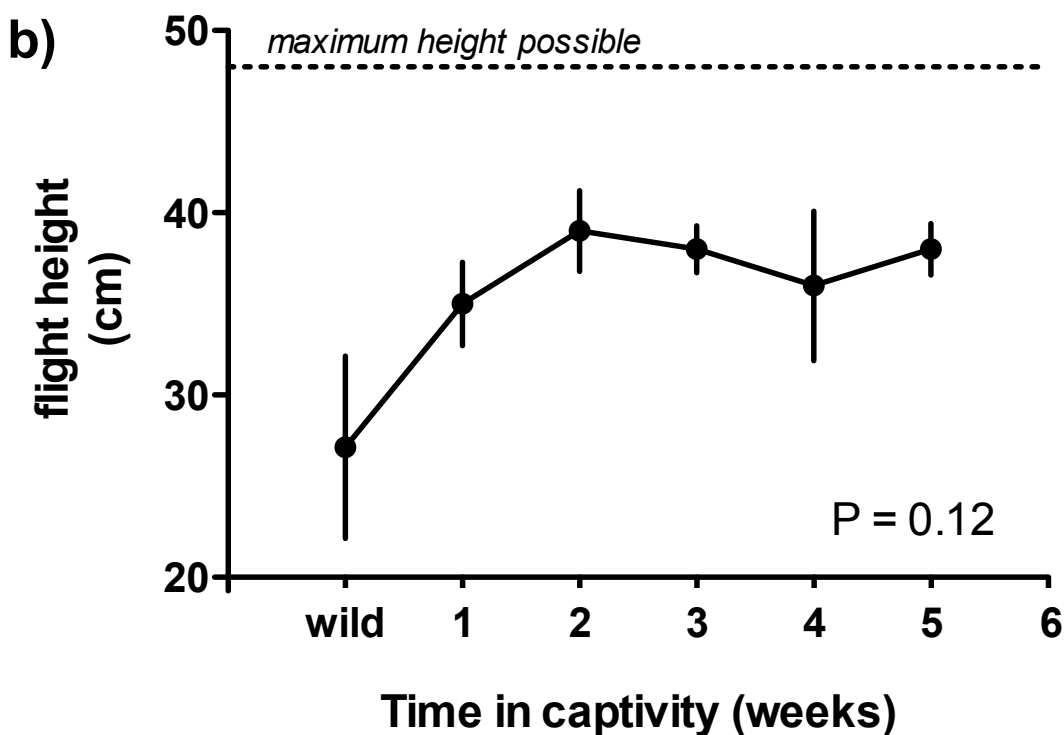

Source: https://cob.silverchair.com/jeb/article-pdf/doi/10.1242/jeb.073049/2036339/jeb_073049.pdf
